# Supplementary material for: Recent Advances in the Remediation of Textile-Dye-Containing Wastewater: Prioritizing Human Health and Sustainable Wastewater Treatment
Source: MDPI journal article supplement (doi:10.3390/su16020495), 2024-01-05
Supplement: s1 [file s1]

## **Supporting information**

### **Recent advances in the remediation of Textile dye-containing wastewater: Prioritizing Human Health and Sustainable Wastewater Treatment**

Aravin Prince Periyasamy

Table S1. Advantages and disadvantages of biological methods for dye removal.

| Process                                                                                                                   | Advantages                                                                                                                                                                                                          | Disadvantages                                                                                                                                                                                                                                                                                                                                                                         |
|---------------------------------------------------------------------------------------------------------------------------|---------------------------------------------------------------------------------------------------------------------------------------------------------------------------------------------------------------------|---------------------------------------------------------------------------------------------------------------------------------------------------------------------------------------------------------------------------------------------------------------------------------------------------------------------------------------------------------------------------------------|
| Biological methods<br>Bioreactors<br>Biological activated sludge<br>Microbiological treatments<br>Enzymatic decomposition | <ul style="list-style-type: none"><li>- Inexpensive process.</li><li>- Variety of species can be used.</li><li>- Good removal of BOD and SS</li><li>- Better elimination of growing pollutants from water</li></ul> | <ul style="list-style-type: none"><li>- Needs organization and maintenance of the microbes.</li><li>- Longer time of operations.</li><li>- Low efficiency of dye degradation.</li><li>- Sludge generation</li><li>- Synergy between species and their impact on treatment</li><li>- Complex nature of microorganism</li><li>- Not suitable for all class of dyes.</li><li>-</li></ul> |

Table S2. Dye degradation by various bacterial biomass.

| Bacteria Culture          | Dyes                   | Mechanism      | % Removal | Ref. |
|---------------------------|------------------------|----------------|-----------|------|
| Citrobacter sp            | Malachite Green        | Biodegradation | 86 %      | [1]  |
| Pseudomonas sp.           | P-Nitrophenol          | Bioremediation | 97%       | [2]  |
| Pseudomonas luteola       | Acid Red-G             | Azo-reductases | 36 %      | [3]  |
| Pseudomonas stutzeri      | Acid anthraquinone dye | Bio-sorption   | 50-60 %   | [3]  |
| Streptomyces viridosporus | Azo Red-171            | Ion-exchange   | 75 %      | [4]  |
| Micrococcus glutamicus    | Reactive Black-5       | Bio-sorption   | 93 %      | [5]  |

Table S3. Advantages of combination-based (hybrid) processes.

| Categories        | Hybrid process                   | Advantages                                                                                                                                                                           | Ref   |
|-------------------|----------------------------------|--------------------------------------------------------------------------------------------------------------------------------------------------------------------------------------|-------|
| Chemical/physical | Photocatalytic membrane reactors | <ul style="list-style-type: none"><li>- Able to destroy all type of organic pollutants.</li><li>- Limits penetration</li><li>- Energy efficient and required small reactor</li></ul> | [6,7] |
|                   | Electro-Oxidation                | <ul style="list-style-type: none"><li>- No formation by products and no more requirement of toxic chemicals.</li><li>- Possibility of process control</li></ul>                      | [8,9] |

| Categories          | Hybrid process                        | Advantages                                                                                                       | Ref     |
|---------------------|---------------------------------------|------------------------------------------------------------------------------------------------------------------|---------|
| Chemical/biological | MEC                                   | - Simple design and it enhance for the removal of azo dyes.                                                      | [10]    |
|                     | MBR                                   | - Efficient even if wastewater containing higher COD (above 3 g/L), no microbes and solid presence in the waste. | [11,12] |
| Chemical/chemical   | Coagulation-Fenton                    | - Efficient degrading azo dyes and other synthetic dyes                                                          | [13]    |
|                     | Sono-photocatalysis                   | - Efficient elimination of toxicity, cheaper process.                                                            | [14,15] |
|                     | AOPs-Photocatalysis (Hybrid Z-scheme) | - Efficient reduction of pollutants, significant removal of all type of dyes.<br>- Faster reactions.             | [16]    |

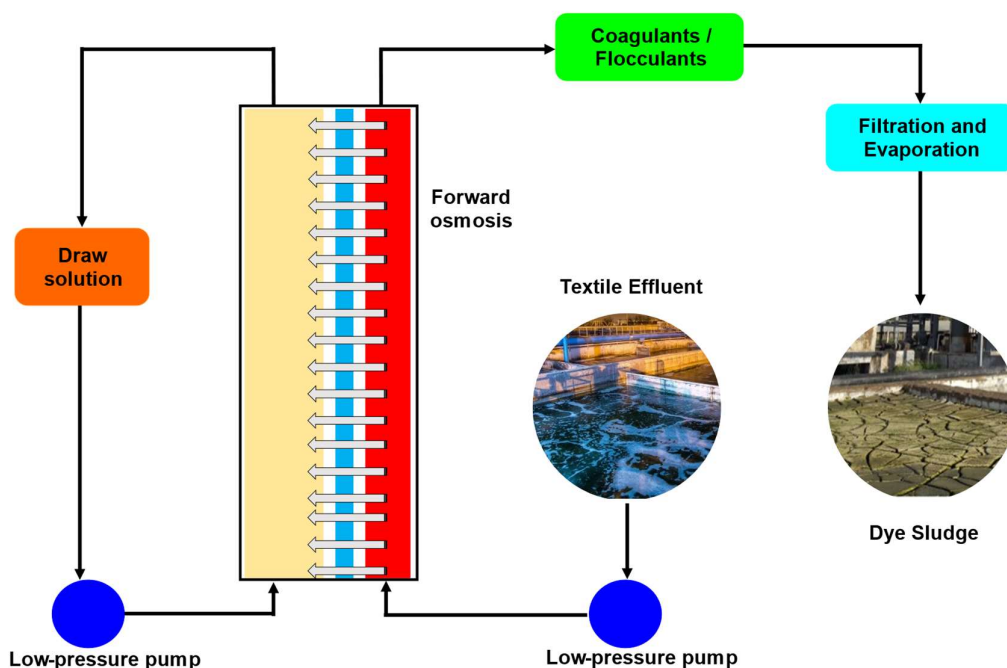

Figure S1. Schematic representation of forward osmosis process.

## Reference

1. An, S.-Y.; Min, S.-K.; Cha, I.-H.; Choi, Y.-L.; Cho, Y.-S.; Kim, C.-H.; Lee, Y.-C. Decolorization of Triphenylmethane and Azo Dyes by *Citrobacter* Sp. *Biotechnol Lett* **2002**, *24*, 1037–1040, doi:10.1023/A:1015610018103.
2. Das, A.; Dey, A. P-Nitrophenol -Bioremediation Using Potent *Pseudomonas* Strain from the Textile Dye Industry Effluent. *J Environ Chem Eng* **2020**, *8*, 103830, doi:10.1016/j.jece.2020.103830.

3. Walker, G.M.; Weatherley, L.R. Prediction of Bisolute Dye Adsorption Isotherms on Activated Carbon. *Process Safety and Environmental Protection* **2000**, *78*, 219–223, doi:10.1205/095758200530673.
4. Ball, A.S.; Colton, J. Decolorisation of the Polymeric Dye Poly R ByStreptomyces Viridosporus T7A. *J Basic Microbiol* **1996**, *36*, 13–18, doi:10.1002/jobm.3620360104.
5. Vijayaraghavan, K.; Yun, Y.S. Utilization of Fermentation Waste (Corynebacterium Glutamicum) for Biosorption of Reactive Black 5 from Aqueous Solution. *J Hazard Mater* **2007**, *141*, 45–52, doi:10.1016/J.JHAZMAT.2006.06.081.
6. Dionysiou, D.D.; Balasubramanian, G.; Suidan, M.T.; Khodadoust, A.P.; Baudin, I.; L  n  , J.M. Rotating Disk Photocatalytic Reactor: Development, Characterization, and Evaluation for the Destruction of Organic Pollutants in Water. *Water Res* **2000**, *34*, 2927–2940, doi:10.1016/S0043-1354(00)00022-1.
7. Choi, H.; Sofranko, A.C.; Dionysiou, D.D. Nanocrystalline TiO<sub>2</sub> Photocatalytic Membranes with a Hierarchical Mesoporous Multilayer Structure: Synthesis, Characterization, and Multifunction. *Adv Funct Mater* **2006**, *16*, 1067–1074, doi:10.1002/adfm.200500658.
8. Yu, R.F.; Lin, C.H.; Chen, H.W.; Cheng, W.P.; Kao, M.C. Possible Control Approaches of the Electro-Fenton Process for Textile Wastewater Treatment Using on-Line Monitoring of DO and ORP. *Chemical Engineering Journal* **2013**, *218*, 341–349, doi:10.1016/J.CEJ.2012.12.061.
9. Rosales, E.; Pazos, M.; Longo, M.A.; Sanrom  n, M.A. Electro-Fenton Decoloration of Dyes in a Continuous Reactor: A Promising Technology in Colored Wastewater Treatment. *Chemical Engineering Journal* **2009**, *155*, 62–67, doi:10.1016/J.CEJ.2009.06.028.
10. Liu, Y.; Zhang, Y.; Quan, X.; Zhang, J.; Zhao, H.; Chen, S. Effects of an Electric Field and Zero Valent Iron on Anaerobic Treatment of Azo Dye Wastewater and Microbial Community Structures. *Bioresour Technol* **2011**, *102*, 2578–2584, doi:10.1016/J.BIORTECH.2010.11.109.
11. Tao, Y.; Gao, D.W.; Fu, Y.; Wu, W.M.; Ren, N.Q. Impact of Reactor Configuration on Anammox Process Start-up: MBR versus SBR. *Bioresour Technol* **2012**, *104*, 73–80, doi:10.1016/J.BIORTECH.2011.10.052.
12. Martin, I.; Pidou, M.; Soares, A.; Judd, S.; Jefferson, B. Modelling the Energy Demands of Aerobic and Anaerobic Membrane Bioreactors for Wastewater Treatment. *Environ Technol* **2011**, *32*, 921–932, doi:10.1080/09593330.2011.565806.
13. Zhang, J.; Chen, S.; Zhang, Y.; Quan, X.; Zhao, H.; Zhang, Y. Reduction of Acute Toxicity and Genotoxicity of Dye Effluent Using Fenton-Coagulation Process. *J Hazard Mater* **2014**, *274*, 198–204, doi:10.1016/J.JHAZMAT.2014.04.022.
14. Ertugay, N.; Acar, F.N. The Degradation of Direct Blue 71 by Sono, Photo and Sonophotocatalytic Oxidation in the Presence of ZnO Nanocatalyst. *Appl Surf Sci* **2014**, *318*, 121–126, doi:10.1016/J.APSUSC.2014.01.178.

15. Durán, A.; Monteagudo, J.M.; Sanmartín, I.; Gómez, P. Homogeneous Sonophotolysis of Food Processing Industry Wastewater: Study of Synergistic Effects, Mineralization and Toxicity Removal. *Ultrason Sonochem* **2013**, *20*, 785–791, doi:10.1016/J.ULTSONCH.2012.09.011.
16. Abebe, B.; Murthy, H.C.A.; Amare, E. Summary on Adsorption and Photocatalysis for Pollutant Remediation: Mini Review. *Journal of Encapsulation and Adsorption Sciences* **2018**, *08*, 225–255, doi:10.4236/jeas.2018.84012.
